# Supplementary material
Source: publisher site journal article supplement (https://www.dovepress.com/article/593842)
Supplement: Supplementary file 1 [file 593842_Supplementary%20Material_2.docx]

# **Supplementary Material**

## ***Supplementary Appendix 1. Overview of survey domains and example items***

Supplementary Appendix 1 provides an overview of the major domains of the Geriatric‑Focused Vascular ERAS Nursing Practices Questionnaire and illustrates how these domains were mapped to ERAS guideline recommendations. The table is designed to demonstrate the linkage between specific guideline statements and nurse‑reported items.

**Supplementary Table S1:** Survey domains and example items mapped to ERAS recommendations

| Domain | ERAS/SVS recommendation (simplified) | Example nurse‑level item (Chinese questionnaire) | Response scale |
| --- | --- | --- | --- |
| Preoperative education and optimisation | Provide structured counselling regarding procedure, risks, benefits, and recovery expectations for open aortic surgery | “For patients aged 65 years and older undergoing open or hybrid aortic surgery, I provide or reinforce structured verbal and written information about the procedure and expected recovery.” | 5‑point frequency (never–always) |
| Frailty and cognitive/delirium risk assessment | Assess frailty and cognitive status preoperatively and consider in planning | “In my unit, older vascular patients are routinely assessed for frailty (for example, using a structured tool or documented clinical judgement) before surgery.” | 5‑point frequency (never–always) |
| Intraoperative and PACU nursing care | Maintain normothermia and support multimodal, opioid‑sparing analgesia | “During and immediately after surgery, I actively monitor and maintain patients’ body temperature using warming devices according to protocol.” | 5‑point frequency (never–always) |
| Postoperative ward‑based care | Promote early mobilisation, early oral intake and prevention of postoperative delirium | “On the first day after surgery, I encourage medically stable older patients to sit out of bed and begin walking with assistance.” | 5‑point frequency (never–always) |
| Discharge planning and transitional care | Provide structured discharge information and coordinate follow‑up | “Before discharge, I provide older vascular patients and their family members with clear instructions about wound care, medication adherence and when to seek urgent help.” | 5‑point frequency (never–always) |
| Geriatric‑focused ERAS elements | Adapt ERAS to frail and cognitively impaired patients, involve caregivers | “When caring for frail or cognitively impaired older vascular patients, I involve family caregivers in planning and explaining postoperative care and rehabilitation.” | 5‑point frequency (never–always) |
| Attitudes and perceived tailoring | Adapt ERAS pathways to older and frail populations | “Our hospital’s ERAS pathway is adequately adapted to the needs of frail older vascular patients.” | 5‑point agreement (strongly disagree–strongly agree) |
| Barriers and facilitators | Ensure adequate staffing, training and resources to support ERAS | “Limited nurse staffing in my unit makes it difficult to implement early mobilisation for older vascular patients.” | 4‑point barrier scale (not a barrier–major barrier) |
